# Supplementary material for: Enzymatically crosslinked hydrogels based on linear poly(ethylene glycol) polymer: performance and mechanism
Source: Royal Society of Chemistry journal article supplement (doi:10.1039/c7py01597f), 2017-01-01
Supplement: c7py01597f1.pdf [file c7py01597f1.pdf]

## Supporting Information

### **Enzymatically Crosslinked Hydrogels based on Linear Poly(ethylene glycol) Polymer: Performance and Mechanism**

Kaixuan Ren,<sup>ab</sup> Bin Li,<sup>bc</sup> Qinghua Xu,<sup>ab</sup> Chunsheng Xiao,<sup>a</sup> Chaoliang He,<sup>\*a</sup> Gao Li,<sup>\*\*a</sup> and Xuesi Chen<sup>a</sup>

<sup>a</sup> *Key Laboratory of Polymer Ecomaterials, Changchun Institute of Applied Chemistry, Chinese Academy of Sciences, Changchun 130022, P. R. China.*

<sup>b</sup> *University of Chinese Academy of Sciences, Beijing 100039, P. R. China.*

<sup>c</sup> *State Key Laboratory of Polymer Physics and Chemistry, Changchun Institute of Applied Chemistry, Chinese Academy of Sciences, Changchun 130022, P. R. China*

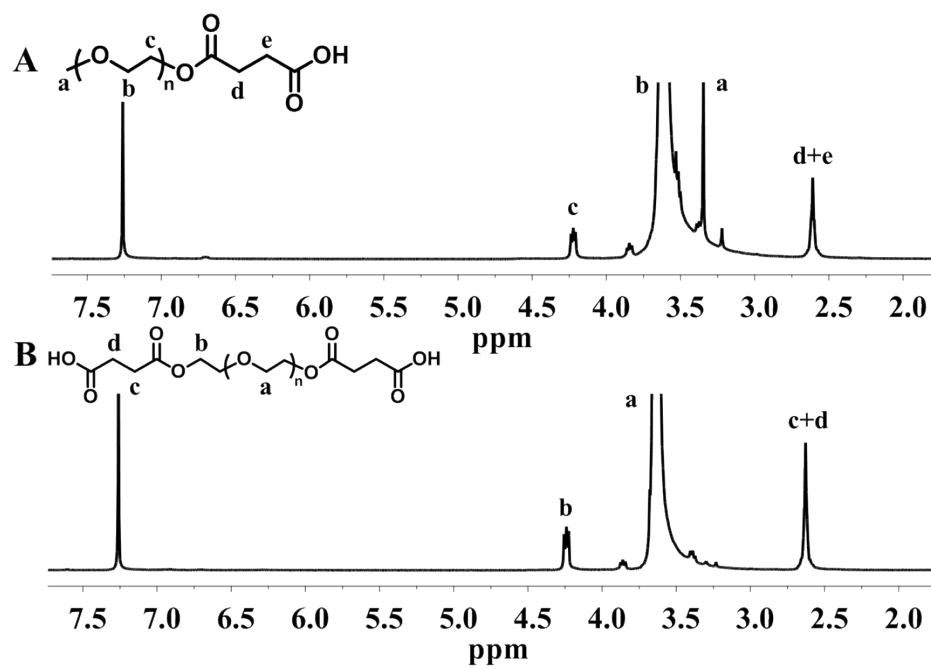

**Fig. S1** <sup>1</sup>H NMR spectra of carboxyl-modified mPEG (A) and PEG (B) in CDCl<sub>3</sub>.

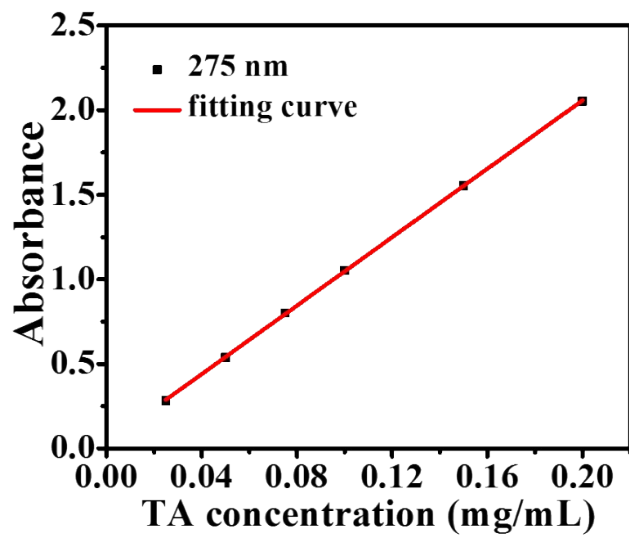

**Fig. S2** Calibration curve of the absorbance at 275 nm of tyramine at different concentrations.

The content of conjugated tyramine groups was calculated by using the fitting formula,  $y = 10.11x - 0.0355$ ,  $R^2 = 0.9999$ .

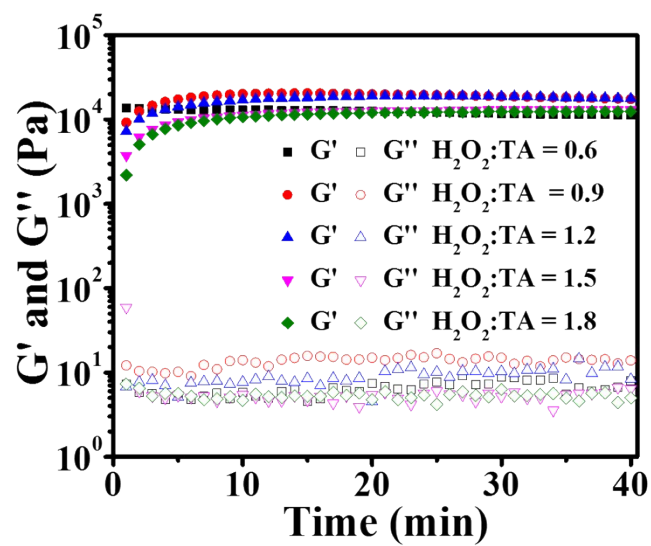

**Fig. S3 (A)**  $G'$  and  $G''$  of TA-PEG-TA hydrogels at different  $H_2O_2/TA$  molar ratio as a function of time. The polymer and HRP concentration were 5% and 8 units/mL, respectively.

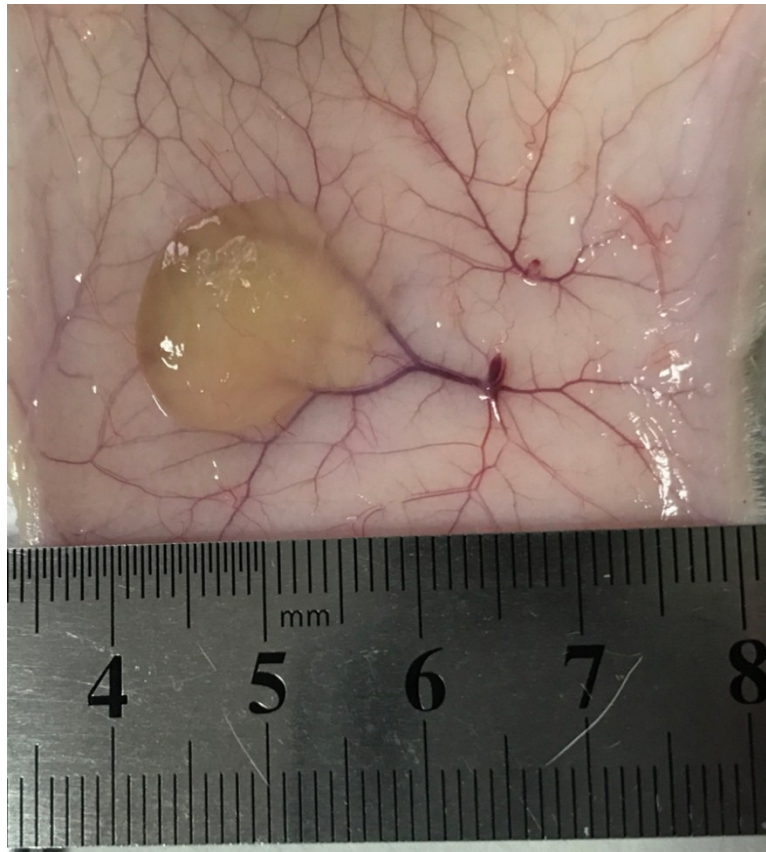

**Fig. S4** *In vivo* TA-PEG-TA hydrogel status of 2.5% gel in the subcutaneous layer of rats after the injection at 30 mins.

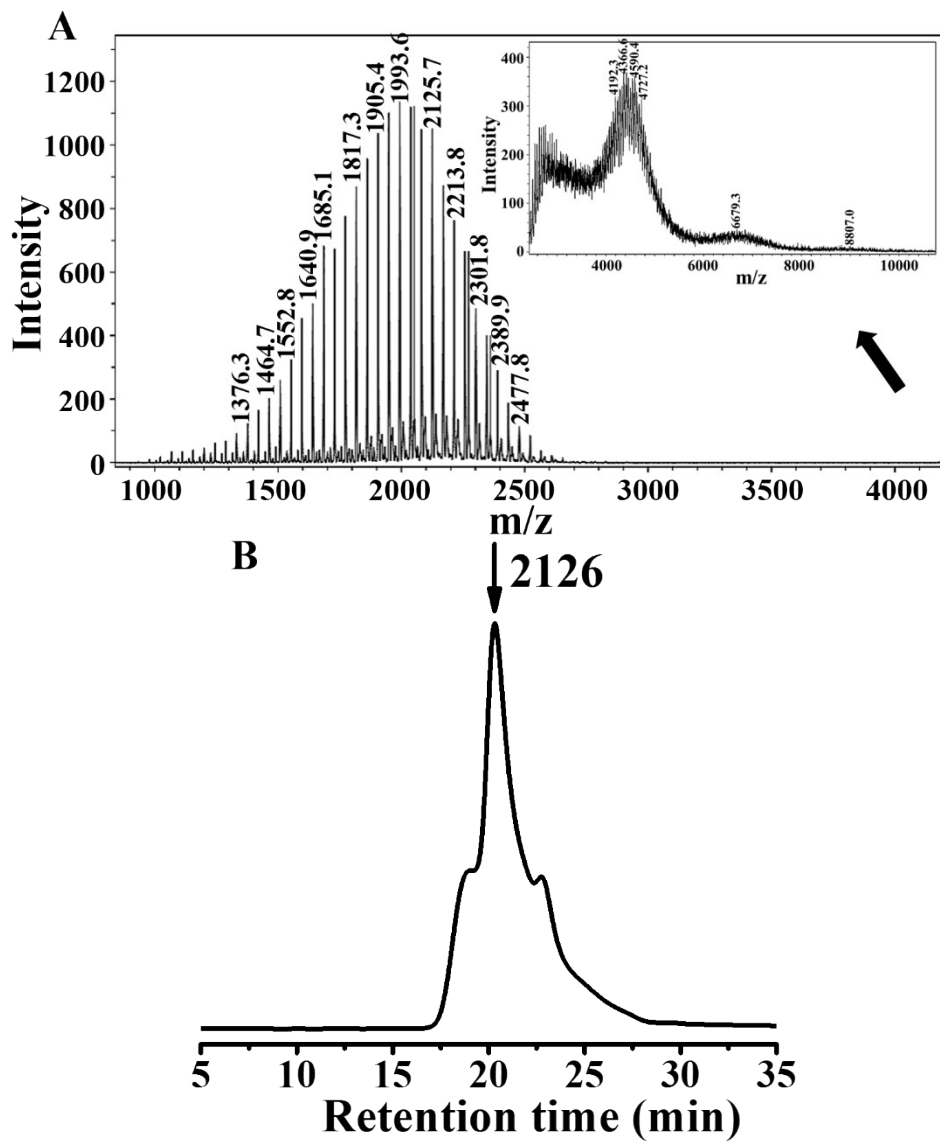

**Fig. S5** (A) MALDI-TOF mass spectra and (B) GPC traces of the products after mixing mPEG-TA with HRP and H<sub>2</sub>O<sub>2</sub>. The H<sub>2</sub>O<sub>2</sub>/TA molar ratio was 0.3. The insert is the partially magnified MALDI-TOF mass spectrum.
